# Supplementary material for: Chemotherapy-induced weight gain in early-stage breast cancer: a prospective matched cohort study reveals associations with inflammation and gut dysbiosis
Source: Springer Nature journal article supplement (doi:10.1186/s12916-023-02751-8), 2023-05-11
Supplement: MOESM1 [file 25346430]

1 **Chemotherapy-induced inflammation links gut dysbiosis with metabolism and weight gain in**  
2 **early-stage breast cancer: a prospective matched cohort study**

3

4 John Walker et al.

5

6 **Supplementary Methods**

7 **Sample collection timing**

8 For patients who received chemotherapy as neoadjuvant treatment prior to surgery, stool samples were  
9 collected at baseline (prior to beginning treatment with chemotherapy), following the end of  
10 chemotherapy (pre-operatively), and at approximately one-year from enrolment to study. For patients  
11 who received only endocrine therapy as adjuvant treatment to surgery, stool samples were collected at  
12 baseline (pre-operatively), then again in the post-operative period (prior to beginning endocrine  
13 therapy), and at approximately one-year from enrolment to study. For patients who received adjuvant  
14 chemotherapy following surgery, stool samples were collected at baseline (pre-operatively), then again  
15 in the post-operative period (prior to beginning chemotherapy), following the end of chemotherapy, and  
16 at approximately one-year from enrolment to study.

17 **Proteomic analysis**

18 EDTA plasma samples were analyzed by Olink Proteomics AB (Uppsala, Sweden). Using PEA  
19 technology, levels of 92 inflammation-related protein biomarkers were measured. Pairs of  
20 oligonucleotide-labeled antibody probes bind to their targeted protein, and if the two probes are brought  
21 in close proximity the oligonucleotides will hybridize in a pair-wise manner. The addition of a DNA  
22 polymerase leads to a proximity-dependent DNA polymerization event, generating a unique PCR target  
23 sequence. The resulting DNA sequence is subsequently detected and quantified using a microfluidic

24 real-time PCR instrument (Biomark HD, Fluidigm Corporation, CA, USA). Data is quality controlled  
25 and normalized using an internal extension control and an inter-plate control to adjust for intra- and  
26 inter-run variation. The final assay read-out is presented in Normalized Protein eXpression (NPX)  
27 values, which is an arbitrary unit on a log<sub>2</sub>-scale proportional to protein expression. Proteins were  
28 excluded from analysis if >20% of individual measurements were below the lower limit of detection.  
29 When <20% was below lower limit of detection, missing values were replaced by the limit of detection  
30 divided by two. All assay validation data for the proteins in the inflammation panel (detection limits,  
31 intra- and inter-assay precision data, accuracy, *et cetera*) are available on manufacturer's website  
32 ([www.olink.com](http://www.olink.com)).
